# Supplementary material for: Using country of origin to inform targeted tuberculosis screening in asylum seekers: a modelling study of screening data in a German federal state, 2002–2015
Source: Springer Nature journal article supplement (doi:10.1186/s12879-019-3902-x), 2019-04-03
Supplement: MOESM2 [file 16599874]

**Supplementary file 3: Period averaged incidence of tuberculosis (per 100,000) and corresponding 95% confidence intervals reported by WHO, 1990-2014 (own calculations)**

| Country                | Incidence | 95 % CI (lower bound) | 95 % CI (upper bound) |
|------------------------|-----------|-----------------------|-----------------------|
| Afghanistan            | 189.12    | 172.84                | 206.28                |
| Albania                | 21.2      | 17.72                 | 25.28                 |
| Algeria                | 80.2      | 70.52                 | 90.32                 |
| Angola                 | 321.52    | 208.08                | 459.2                 |
| Armenia                | 53.88     | 50.6                  | 57.32                 |
| Bangladesh             | 225       | 204.64                | 246.12                |
| Belarus                | 68.24     | 62.64                 | 74.28                 |
| Benin                  | 84.88     | 69.04                 | 102.36                |
| Bosnia and Herzegovina | 74.92     | 54.48                 | 98.4                  |
| Bulgaria               | 49        | 46.48                 | 51.76                 |
| Burkina Faso           | 69.68     | 65.16                 | 74.16                 |
| Cambodia               | 520.72    | 478.08                | 565.24                |
| Cameroon               | 249.08    | 230.08                | 268.88                |
| Cape Verde             | 157.64    | 143.52                | 172.6                 |
| Chad                   | 140.44    | 129.64                | 151.52                |
| Chile                  | 25.48     | 22.4                  | 28.76                 |
| China                  | 104.76    | 98                    | 111.88                |
| Comoros                | 39.88     | 33.04                 | 47.56                 |
| Congo                  | 334.28    | 305.72                | 364.52                |
| Croatia                | 37        | 32.44                 | 41.88                 |
| Cuba                   | 13.584    | 12.24                 | 15.04                 |
| Dominican Republic     | 96.08     | 87.2                  | 105.52                |
| Egypt                  | 24.64     | 23.08                 | 26.32                 |
| Eritrea                | 156.48    | 113.84                | 205.64                |
| Ethiopia               | 351.12    | 294                   | 413.56                |
| Gabon                  | 439.88    | 406.24                | 474.92                |
| Gambia                 | 169.68    | 148.72                | 192.24                |
| Georgia                | 205.52    | 196.56                | 215.12                |
| Ghana                  | 202.88    | 94.48                 | 352.4                 |
| Guinea                 | 218.88    | 202.24                | 235.92                |
| Honduras               | 87.04     | 75.04                 | 99.76                 |
| Hungary                | 30.2      | 26.56                 | 34.24                 |
| India                  | 204.76    | 195.12                | 214.72                |
| Iran                   | 25.92     | 22.8                  | 29.12                 |
| Iraq                   | 49.16     | 43.16                 | 55.64                 |
| Ivory Coast            | 286.56    | 270.6                 | 302.76                |
| Jordan                 | 8.804     | 7.732                 | 9.976                 |
| Kazakhstan             | 134.6     | 87.04                 | 192.28                |
| Kenya                  | 259.04    | 252.56                | 265.6                 |

|                         |        |          |          |
|-------------------------|--------|----------|----------|
| Korea                   | 390.4  | 335.2    | 450.28   |
| Kosovo*                 | 43.7   | 38.79084 | 49.05814 |
| Kuwait                  | 27.32  | 23.84    | 30.8     |
| Lebanon                 | 19.72  | 17.36    | 22.4     |
| Liberia                 | 253    | 230.72   | 276.88   |
| Libya                   | 40     | 33.12    | 47.76    |
| Lithuania               | 81.32  | 77.08    | 85.76    |
| Macedonia               | 33.72  | 29.56    | 38.12    |
| Maldives                | 73.72  | 66.56    | 81.56    |
| Mali                    | 71.76  | 70.32    | 73.2     |
| Mauritania              | 238.24 | 194.16   | 287.12   |
| Mongolia                | 262    | 241.4    | 283.56   |
| Montenegro              | 23.3   | 20.6     | 26.6     |
| Morocco                 | 119.68 | 111.52   | 127.96   |
| Myanmar                 | 397.48 | 366.32   | 430.16   |
| Nepal                   | 162.72 | 148.12   | 178.12   |
| Niger                   | 193.76 | 179.76   | 208.16   |
| Nigeria                 | 316.36 | 227.36   | 420.52   |
| Pakistan                | 275.44 | 224.6    | 331.4    |
| Palestinian territories | 7.904  | 6.924    | 8.888    |
| Philippines             | 358.52 | 327.04   | 391.8    |
| Poland                  | 33.12  | 29       | 37.6     |
| Romania                 | 149.96 | 138.76   | 161.4    |
| Russia                  | 106.16 | 99.24    | 113.36   |
| Senegal                 | 144.84 | 133.84   | 156.28   |
| Sierra Leone            | 299.32 | 251.72   | 351.32   |
| Slovakia                | 20.908 | 18.44    | 23.776   |
| Solomon Islands         | 178.16 | 139.4    | 222.32   |
| Somalia                 | 284.96 | 259.44   | 311.76   |
| Spain                   | 21     | 18.52    | 23.8     |
| Sri Lanka               | 65.96  | 60.28    | 72.32    |
| Sudan                   | 124.32 | 67.44    | 198.64   |
| Syria                   | 33.72  | 27.2     | 41.08    |
| Togo                    | 60.68  | 49.36    | 73.16    |
| Tunisia                 | 27.6   | 26       | 29.16    |
| Turkey                  | 35.8   | 31.4     | 40.52    |
| Turkmenistan            | 146.08 | 120.12   | 174.64   |
| Uganda                  | 382.64 | 322.04   | 448.92   |
| Ukraine                 | 99.4   | 92.08    | 107.12   |
| United States           | 6.876  | 6.024    | 7.796    |
| Vietnam                 | 190.28 | 167.6    | 214.68   |

\*Data for Kosovo was taken and re-calculated from Kurhasani X, Hafizi H, Toci E, Burazeri G. Tuberculosis Incidence and Case Notification Rates in Kosovo and the Balkans in 2012: Cross-country Comparison. *Materia Socio-Medica* 2014; **26**(1): 55-8.
