# Supplementary material for: Using country of origin to inform targeted tuberculosis screening in asylum seekers: a modelling study of screening data in a German federal state, 2002–2015
Source: Springer Nature journal article supplement (doi:10.1186/s12879-019-3902-x), 2019-04-03
Supplement: MOESM3 [file 16599874]

## Supplementary file 1 – Yield of screening and number needed to screen

| Characteristic   | Yield of active TB per 1000 screened (95% CrI) | Number needed to screen to detect 1 case of active TB (95% CrI) |
|------------------|------------------------------------------------|-----------------------------------------------------------------|
| <b>Age group</b> |                                                |                                                                 |
| <15 years        | 0.16 (0.06, 0.39)                              | 6,062 (2,550, 17,959)                                           |
| 15-24 years      | 0.99 (0.70, 1.36)                              | 1,011 (736, 1,427)                                              |
| 25-44 years      | 1.10 (0.84, 1.41)                              | 913 (708, 1,196)                                                |
| 45-64 years      | 0.40 (0.11, 1.06)                              | 2,528 (947, 8,974)                                              |
| >64 years        | --                                             | --                                                              |
| <b>Sex</b>       |                                                |                                                                 |
| Female           | 0.35 (0.20, 0.59)                              | 2,836 (1,707, 5,060)                                            |
| Male             | 1.04 (0.83, 1.27)                              | 965 (785, 1,200)                                                |
| <b>Year</b>      |                                                |                                                                 |
| 2002-2012        | 1.12 (0.81, 1.50)                              | 894 (666, 1,228)                                                |
| 2013             | 0.49 (0.22, 0.95)                              | 2,058 (1,048, 4,601)                                            |
| 2014             | 1.00 (0.66, 1.47)                              | 997 (681, 1,516)                                                |
| 2015             | 0.59 (0.39, 0.85)                              | 1695 (1,175, 2,534)                                             |
| <b>Country</b>   |                                                |                                                                 |
| Afghanistan      | 0.27 (0.06, 0.86)                              | 3,716 (1,159, 17,883)                                           |
| Cameroon         | 2.00 (0.76, 4.37)                              | 501 (229, 1,313)                                                |
| Eritrea          | 4.64 (2.30, 8.45)                              | 216 (118, 435)                                                  |
| Gambia           | 2.58 (1.59, 3.99)                              | 387 (251, 630)                                                  |
| Georgia          | 2.36 (0.90, 5.16)                              | 424 (194, 1,111)                                                |
| Iraq             | 0.10 (0.01, 0.47)                              | 9,955 (2,130, 92,262)                                           |
| Kosovo           | 0.34 (0.15, 0.68)                              | 2,905 (1,480, 6,494)                                            |
| Macedonia        | 0.29 (0.06, 0.92)                              | 3,502 (1,092, 16,854)                                           |
| Pakistan         | 1.37 (0.61, 2.69)                              | 729 (372, 1,629)                                                |
| Russia           | 1.65 (0.63, 3.62)                              | 605 (276, 1,585)                                                |
| Somalia          | 6.83 (3.06, 13.36)                             | 146 (75, 327)                                                   |
| Syria            | 0.29 (0.11, 0.64)                              | 3,434 (1,567, 9,000)                                            |
